# Supplementary material for: Simulating the Impacts of Drought and Warming in Summer and Autumn on the Productivity of Subtropical Coniferous Forests
Source: MDPI journal article supplement (doi:10.3390/f13122147), 2022-12-15
Supplement: s1 [file s1]

# Supplementary file

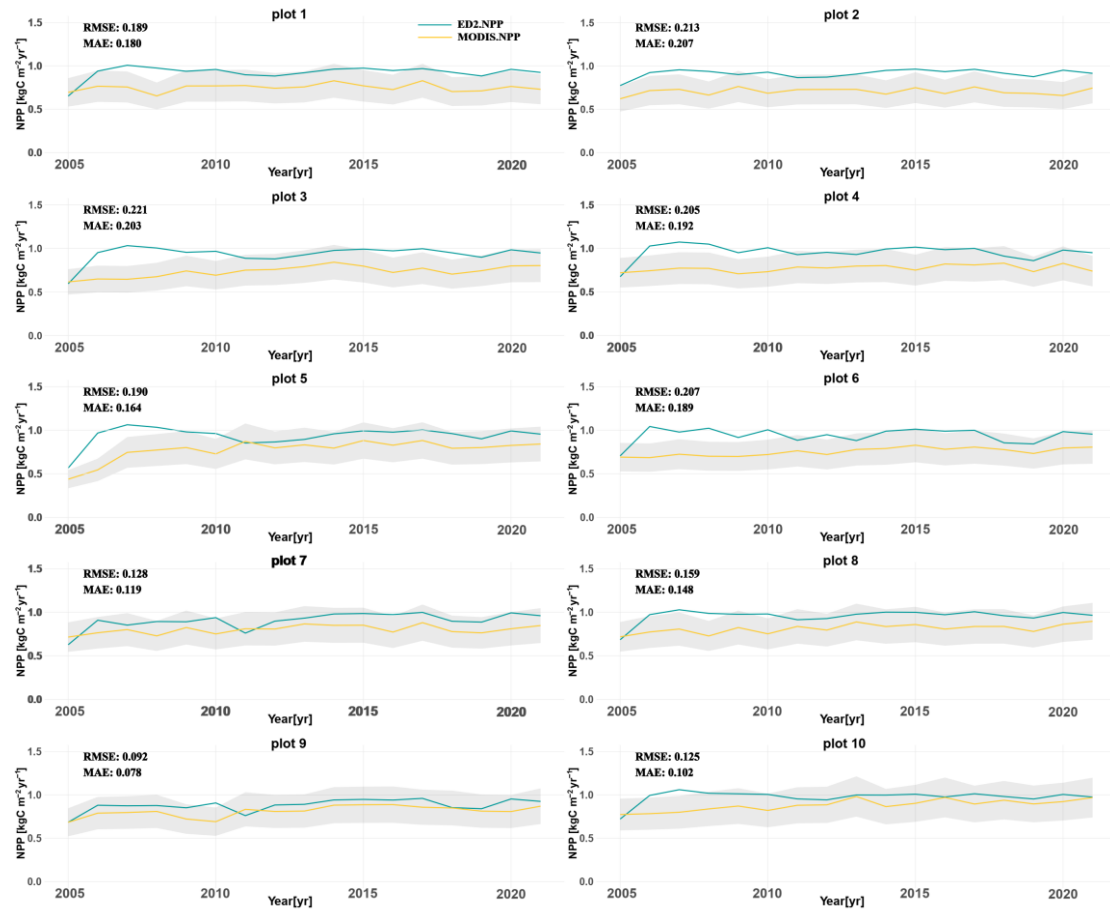

Figure S1. ED2 simulated annual NPP vs. MODIS-NPP for separate forest plot.

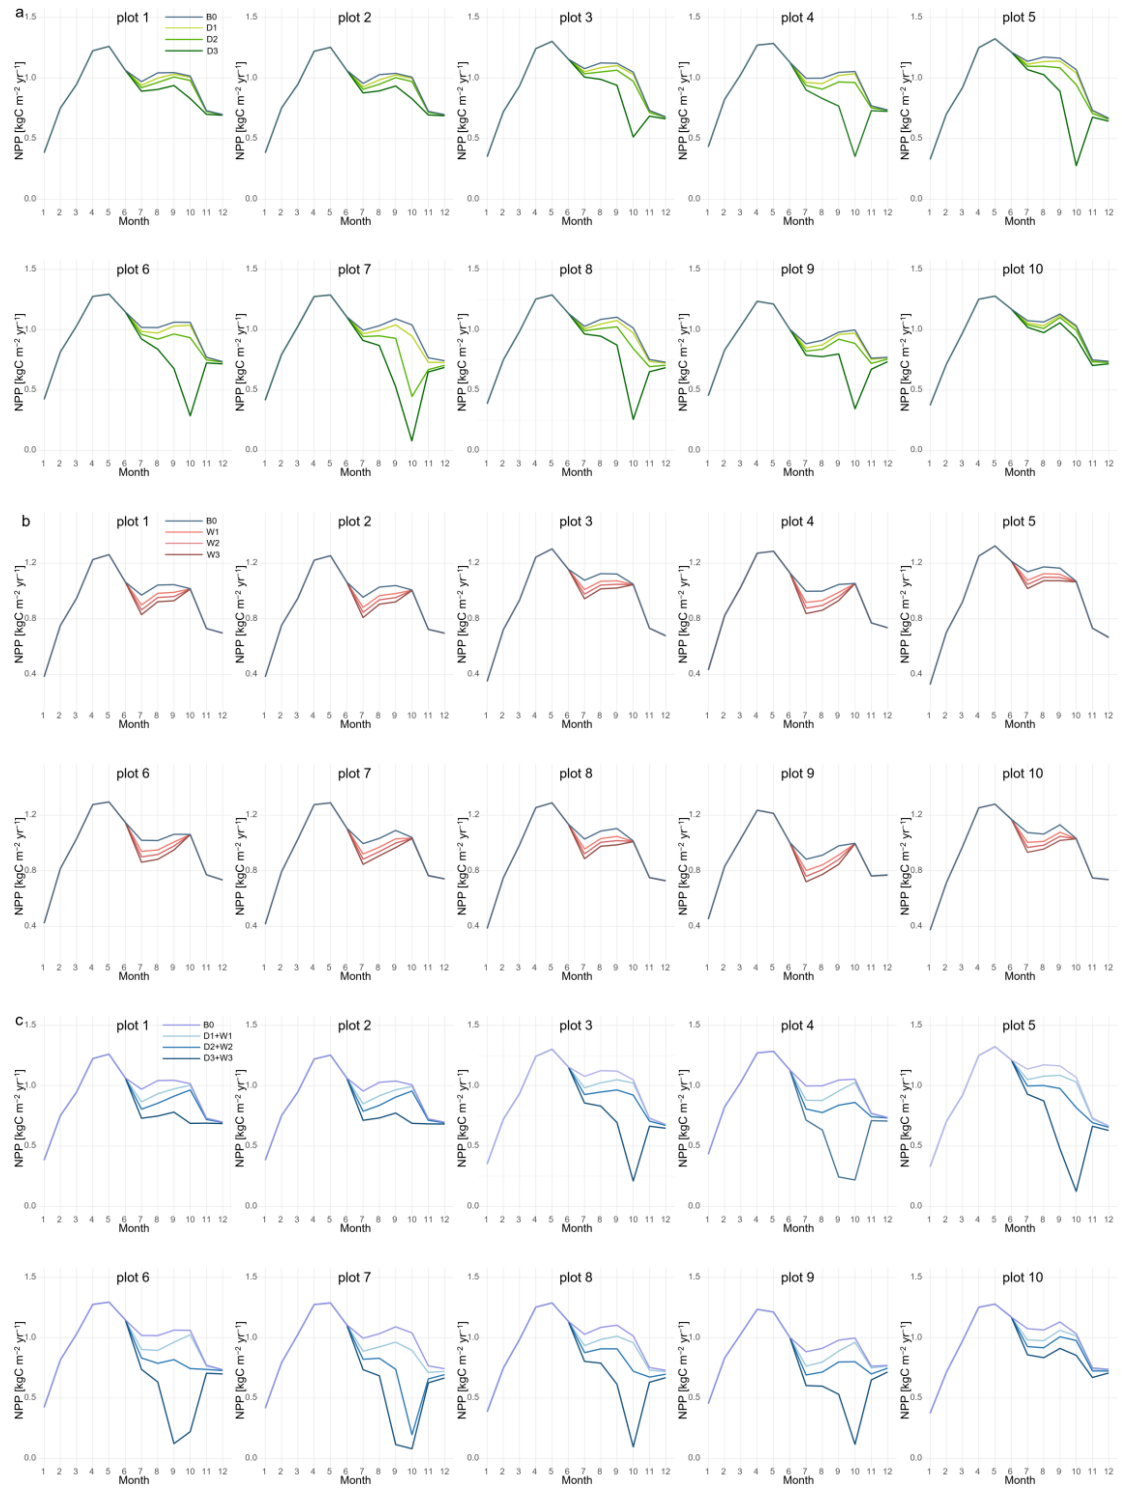

**Figure S2.** ED2 simulated monthly NPP for separate forest plot under different scenarios.
