# Supplementary material for: Simulating the Impacts of Drought and Warming in Summer and Autumn on the Productivity of Subtropical Coniferous Forests
Source: MDPI journal article supplement (doi:10.3390/f13122147), 2022-12-15
Supplement: s1 [file s1]

Archive with 1 entries (1 files):
- forests-2059702-supplementary.pdf
